# Supplementary material for: Resident and facility characteristics associated with the site of death among Japanese nursing home residents
Source: Oxford University Press journal article supplement (doi:10.1093/ageing/afi162), 2005-08-17
Supplement: afi162_Supplementary_Data.zip [file afi162_Supplementary_Data.zip]

Archive with 1 entries (1 files):
- afi162suppdataAppendix_1.pdf
