# Supplementary material for: Resident and facility characteristics associated with the site of death among Japanese nursing home residents
Source: Oxford University Press journal article supplement (doi:10.1093/ageing/afi162), 2005-08-17
Supplement: afi162_Supplementary_Data.zip [file afi162_Supplementary_Data.zip › afi162suppdataAppendix_1.pdf]

Appendix 1. Characteristics of nursing homes and residents in this study and in the mandatory survey conducted by the Ministry of Health Labor and Welfare (MHLW) in Japan

| Characteristics of nursing homes (as proportions to the total number of beds in nursing homes) |                                 | This study<br><i>n</i> =60,766 | MHLW's study<br><i>n</i> =314,192 |
|------------------------------------------------------------------------------------------------|---------------------------------|--------------------------------|-----------------------------------|
| Ownership/founder                                                                              | Social welfare organization     | 86%                            | 87%                               |
|                                                                                                | Others, including public sector | 14%                            | 13%                               |
| The number of beds in each geographic region                                                   | Hokkaido                        | 5%                             | 5%                                |
|                                                                                                | Touhoku                         | 12%                            | 10%                               |
|                                                                                                | Kanto                           | 23%                            | 24%                               |
|                                                                                                | Chubu                           | 20%                            | 16%                               |
|                                                                                                | Kansai                          | 13%                            | 17%                               |
|                                                                                                | Chugoku/Shikoku                 | 12%                            | 13%                               |
|                                                                                                | Kyushyu                         | 15%                            | 15%                               |
| Staffing level <sup>a</sup> (mean $\pm$ SD)                                                    |                                 | 2.6 $\pm$ 0.4                  | 2.5 <sup>b</sup>                  |
| Characteristics of residents who died in nursing homes                                         |                                 | This study<br><i>n</i> =1,500  | MHLW's study<br><i>n</i> =814     |
| Age                                                                                            | <75                             | 4%                             | 5%                                |
|                                                                                                | 75-79                           | 8%                             | 7%                                |
|                                                                                                | 80-84                           | 15%                            | 17%                               |
|                                                                                                | 85-89                           | 24%                            | 25%                               |
|                                                                                                | 90-94                           | 49%                            | 46%                               |
| Male gender                                                                                    |                                 | 23%                            | 23%                               |
| LOS in nursing homes (year)                                                                    |                                 | 15%                            | 15%                               |

|                                 |                              |     |     |
|---------------------------------|------------------------------|-----|-----|
|                                 | 1-2                          | 13% | 18% |
|                                 | 2-5                          | 32% | 30% |
|                                 | >5                           | 40% | 37% |
| Eligibility level in the public | Care required 1 (the lowest  | 2%  | 2%  |
| long-term care insurance        | level)                       |     |     |
|                                 | Care required 2              | 5%  | 4%  |
|                                 | Care required 3              | 9%  | 11% |
|                                 | Care required 4              | 23% | 24% |
|                                 | Care required 5 (the highest | 61% | 59% |
|                                 | level)                       |     |     |

---

<sup>a</sup> The number of residents per staff (licensed nurses and care workers).

<sup>b</sup> The MHLW survey did not provide standard deviation (SD).

## Appendix 2. Resident characteristics based on the site of death

|                                             | Nursing homes   | Hospitals       | <i>P</i> value <sup>a</sup> |
|---------------------------------------------|-----------------|-----------------|-----------------------------|
| Resident Characteristics                    | <i>n</i> =1,500 | <i>n</i> =2,675 |                             |
| Age (mean ± SD)                             | 88.5 ± 7.2      | 86.4 ± 7.5      | <0 .001                     |
| Male gender (%)                             | 342 (23%)       | 815 (31%)       | < 0.001                     |
| Length of stay in nursing homes (mean ± SD) | 5.1 ± 4.6       | 3.9 ± 3.7       | <0.001                      |
| Activity of daily living                    |                 |                 | < 0.001                     |
| Independent                                 | 25 (2%)         | 84 (3%)         |                             |
| Needs some help                             | 85 (6%)         | 358 (14%)       |                             |
| Mainly in bed, but able to sit              | 347 (23%)       | 919 (35%)       |                             |
| Bed ridden                                  | 1,020 (69%)     | 1,265 (48%)     |                             |
| Cognitive function                          |                 |                 | < 0.001                     |
| Intact                                      | 103 (7%)        | 323 (13%)       |                             |
| Slightly impaired                           | 150 (10%)       | 362 (14%)       |                             |
| Moderately impaired                         | 329 (23%)       | 687 (26%)       |                             |
| Severely impaired                           | 873 (59%)       | 1,226 (47%)     |                             |
| Disease diagnoses                           |                 |                 |                             |
| Cancer                                      | 171 (12%)       | 287 (11%)       | 0.513                       |
| Cardiac disease                             | 433 (30%)       | 890 (35%)       | 0.003                       |
| Cerebrovascular disease                     | 845 (59%)       | 1,530 (60%)     | 0.546                       |
| Chronic obstructive pulmonary disease       | 105 (7%)        | 172 (7%)        | 0.483                       |
| Chronic renal failure                       | 95 (7%)         | 198 (8%)        | 0.190                       |
| Diabetes                                    | 111 (8%)        | 306 (12%)       | <0.001                      |
| Fracture                                    | 175 (12%)       | 301 (12%)       | 0.695                       |
| Hypertension                                | 464 (33%)       | 800 (32%)       | 0.499                       |

|                                                                            |             |             |         |
|----------------------------------------------------------------------------|-------------|-------------|---------|
| Hospitalization three months prior to death                                | 181 (12%)   | 627 (24%)   | <0.001  |
| Cause of death                                                             |             |             |         |
| Cancer                                                                     | 107 (7%)    | 213 (8%)    | 0.236   |
| Heart failure                                                              | 787 (53%)   | 840 (32%)   | < 0.001 |
| Pneumonia                                                                  | 277 (19%)   | 892 (35%)   | < 0.001 |
| Stroke                                                                     | 109 (7%)    | 218 (8%)    | 0.215   |
| Others                                                                     | 104 (14%)   | 250 (17%)   | 0.004   |
| Resident's preference                                                      |             |             |         |
| Dying in nursing home                                                      | 380 (26%)   | 224 (9%)    | < 0.001 |
| Dying in hospital                                                          | 1 (0.1%)    | 88 (3%)     | < 0.001 |
| Dying at home                                                              | 114 (8%)    | 225 (9%)    | 0.357   |
| Not known                                                                  | 989 (66%)   | 2,099 (79%) | < 0.001 |
| Family's preference                                                        |             |             |         |
| Dying in nursing home                                                      | 1278 (86%)  | 591 (23%)   | < 0.001 |
| Dying in hospital                                                          | 29 (2%)     | 880 (34%)   | < 0.001 |
| Dying at home                                                              | 18 (1%)     | 66 (2%)     | 0.005   |
| Not known <sup>c</sup>                                                     | 157 (11%)   | 1056 (41%)  | < 0.001 |
| Preference for the site of death expressed either by residents or families |             |             |         |
| Dying in nursing home                                                      | 1,248 (87%) | 621 (24%)   | < 0.001 |
| Dying in hospital                                                          | 29 (2%)     | 860 (33%)   | < 0.001 |
| Dying at home                                                              | 12 (1%)     | 38 (1%)     | 0.068   |
| Not known                                                                  | 185 (10%)   | 1,066 (42%) | < 0.001 |

<sup>a</sup> P value was based on either t-test or chi-square.
